# Supplementary material for: Exfoliation and film preparation of a layered titanate, Na2Ti3O7, and intercalation of pseudoisocyanine dyeElectronic supplementary information (ESI) available: XRD patterns of (a) the starting material Na2Ti3O7, (b) H/Ti3O7, (c) MA/Ti3O7 and (d) PA/Ti3O7. See http://www.rsc.org/suppdata/jm/b3/b308800f/
Source: Royal Society of Chemistry journal article supplement (doi:10.1039/b308800f), 2004-01-01
Supplement: b308800f.pdf [file b308800f.pdf]

**Exfoliation and film preparation of a layered titanate,  
 $\text{Na}_2\text{Ti}_3\text{O}_7$ , and intercalation of pseudoisocyanine dye**

Nobuyoshi Miyamoto, Kazuyuki Kuroda and Makoto Ogawa

*Supplementary figure*

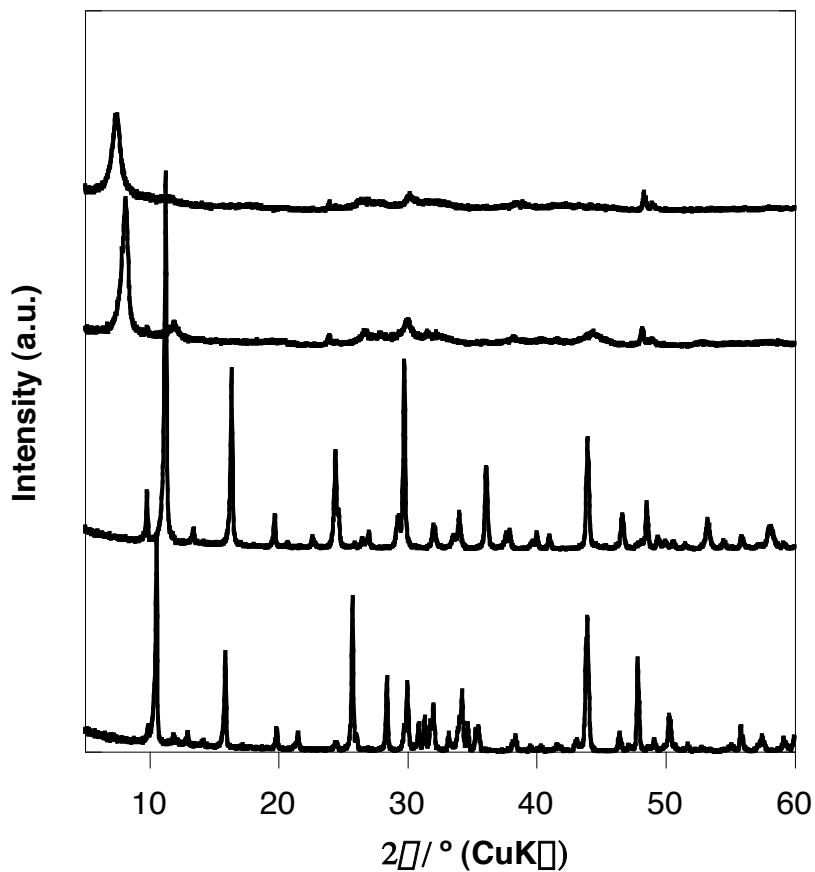

**Figure S1.** XRD patterns of (a) the starting material  $\text{Na}_2\text{Ti}_3\text{O}_7$ , (b)  $\text{H}/\text{Ti}_3\text{O}_7$ , (c)  $\text{MA}/\text{Ti}_3\text{O}_7$  and (d)  $\text{PA}/\text{Ti}_3\text{O}_7$ .
